# Supplementary material for: CO2-Assisted synthesis of hierarchically porous carbon as a supercapacitor electrode and dye adsorbent
Source: Royal Society of Chemistry journal article supplement (doi:10.1039/c8qi01369a), 2019-01-01
Supplement: c8qi01369a1.pdf [file c8qi01369a1.pdf]

## Supporting Information

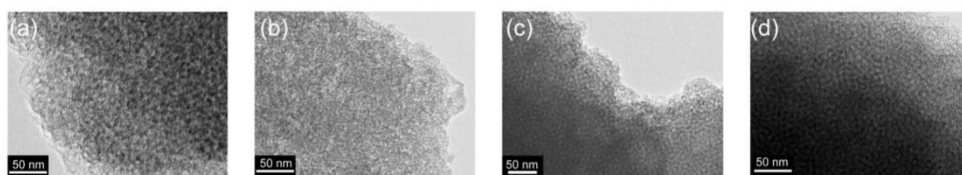

**Figure S1.** Magnified TEM images of HPC prepared at CO<sub>2</sub> pressure of (a) 2.90, (b) 3.90, (c) 4.90, and (d) 5.90 MPa.

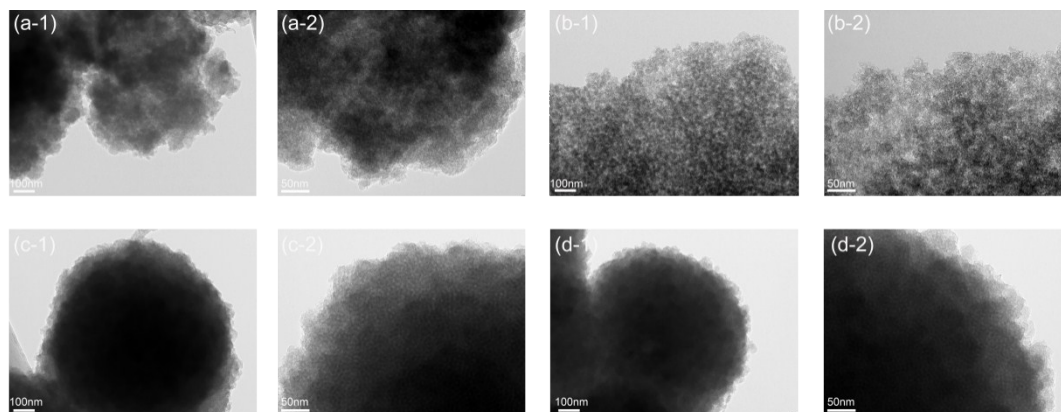

**Figure S2.** TEM images of PSC prepared at CO<sub>2</sub> pressure of (a) 2.90, (b) 3.90, (c) 4.90, and (d) 5.90 MPa.

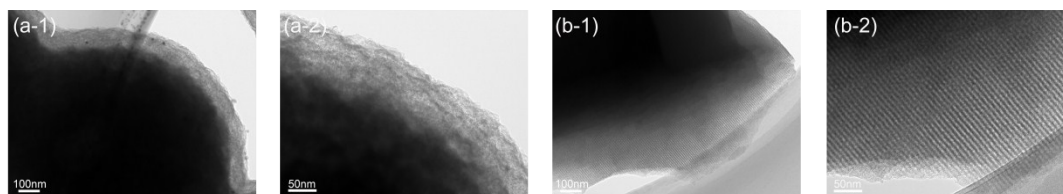

**Figure S3.** TEM images of PSC prepared at 4.90 MPa with the molar ratio of F127 and BTEB (a) 1:12.71 and (b) 1:39.12.

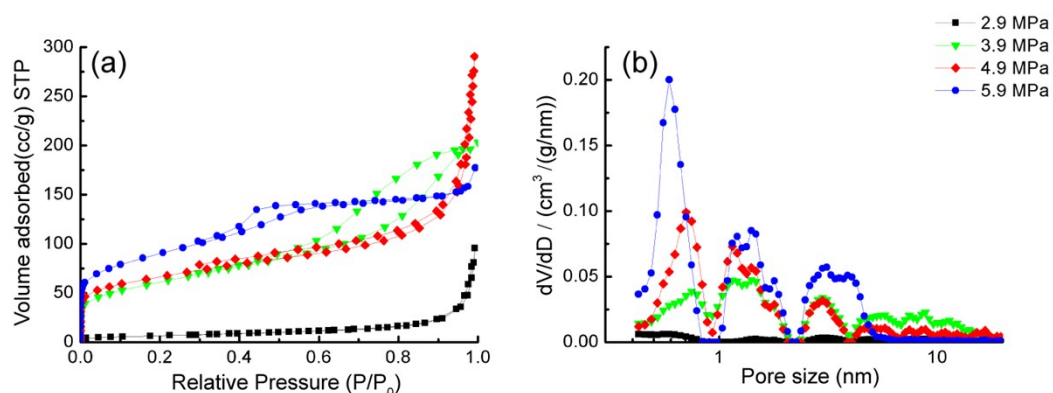

**Figure S4.** (a) Nitrogen adsorption–desorption isotherms, and (b) pore size distributions of PSC prepared at different CO<sub>2</sub> pressure.

**Table S1.** Nitrogen physisorption data of PSC prepared at different CO<sub>2</sub> pressures.

| Pressure<br>(MPa) | $S_{\text{BET}}$<br>( $\text{m}^2 \text{g}^{-1}$ ) | $V_{\text{total}}$<br>( $\text{cm}^3 \text{g}^{-1}$ ) | Micropore size<br>(nm) | Mesopore size (nm) |
|-------------------|----------------------------------------------------|-------------------------------------------------------|------------------------|--------------------|
| PSC-2.9           | 189                                                | 0.29                                                  | 0.59+1.47              | 3.11               |
| PSC-3.9           | 222                                                | 0.43                                                  | 0.75+1.40              | 2.97               |
| PSC-4.9           | 232                                                | 0.44                                                  | 0.70+1.15              | 2.84               |
| PSC-5.9           | 219                                                | 0.31                                                  | 0.59+1.40              | 2.97               |
| PSC-sph           | 138                                                | 0.11                                                  | 0.59+1.40              | 2.84               |
| PSC-str           | 238                                                | 0.34                                                  | 0.75+1.15              | 3.11               |

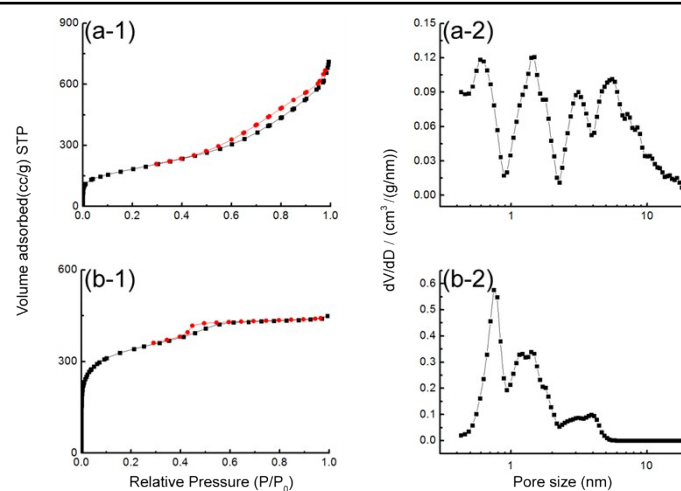**Figure S5.** Nitrogen adsorption–desorption isotherms and pore size distributions of (a) PSC-sph, and (b) PSC-str.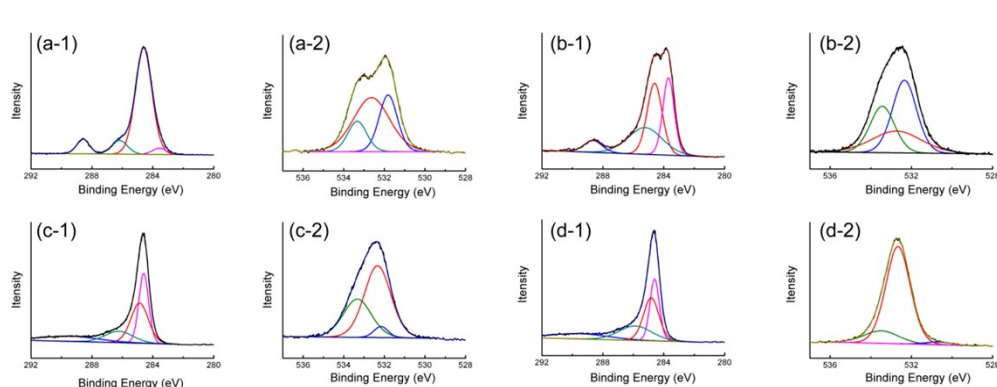**Figure S6.** Deconvoluted C1s and O1s XPS spectra of (a) PSC-2.9, (b) PSC-3.9, (c) PSC-4.9, and (d) PSC-5.9.**Table S2.** Surface C and O configurations of PSC by XPS.

| Sample  | C configuration <sup>a</sup> (%) |       |       |       | O configuration <sup>b</sup> (%) |       |       |
|---------|----------------------------------|-------|-------|-------|----------------------------------|-------|-------|
|         | C-I                              | C-II  | C-III | C-IV  | O-I                              | O-II  | O-III |
| PSC-2.9 | 3.87                             | 78.30 | 9.55  | 8.28  | 28.07                            | 54.93 | 17.0  |
| PSC-3.9 | 28.68                            | 34.83 | 29.63 | 6.86  | 44.20                            | 27.10 | 28.70 |
| PSC-4.9 | 34.18                            | 35.12 | 15.90 | 14.80 | 4.99                             | 60.79 | 34.22 |
| PSC-5.9 | 28.72                            | 32.88 | 23.95 | 14.45 | 2.45                             | 82.51 | 15.04 |

<sup>a</sup>: C sp<sup>2</sup> and sp<sup>3</sup> (C-I), C–O (C-II), C=O (C-III) and O–C=O (C-IV).

<sup>b</sup>: C=O (O-I), C–OH and/or C–O–C (O-II), –COOH (O-III).

The surface chemical properties of all HPC samples have been measured with energy dispersive X-ray spectrometry (EDS) elemental mapping (Tables S3). The results show that there is almost no difference in the chemical compositions among them.

Table S3. Chemical composition of HPC prepared at different CO<sub>2</sub> pressures from EDS element mapping.

| Sample  | C (%) | O (%) |
|---------|-------|-------|
| PSC-2.9 | 61.31 | 38.69 |
| PSC-3.9 | 59.24 | 40.76 |
| PSC-4.9 | 62.33 | 37.67 |
| PSC-5.9 | 59.89 | 40.11 |
